# Supplementary material for: Effectiveness of Lifestyle Interventions for Prevention of Harmful Weight Gain among Adolescents from Ethnic Minorities: A Systematic Review
Source: MDPI journal article supplement (doi:10.3390/ijerph17176059), 2020-08-20
Supplement: s1 [file s1]

**Table S1** Search Strategy Medline (Search 1)

| #  | Searches                                            | Results |
|----|-----------------------------------------------------|---------|
| 1  | Adolescent/                                         | 1865754 |
| 2  | Young Adult/                                        | 665066  |
| 3  | students/                                           | 49191   |
| 4  | adolescen*.tw.                                      | 206344  |
| 5  | young adult*.tw.                                    | 69940   |
| 6  | teen*.tw.                                           | 24337   |
| 7  | youth*.tw.                                          | 51371   |
| 8  | (young adj2 (person or people)).tw.                 | 20650   |
| 9  | highschool*.tw.                                     | 29      |
| 10 | school*.tw.                                         | 217963  |
| 11 | child*.tw.                                          | 1116151 |
| 12 | or/1-11                                             | 3034740 |
| 13 | BMI.tw.                                             | 98755   |
| 14 | body mass index/                                    | 110217  |
| 15 | weight gain/                                        | 28522   |
| 16 | body weight/                                        | 179897  |
| 17 | exp body weight changes/                            | 63514   |
| 18 | Body Mass Index.tw.                                 | 103598  |
| 19 | Weight change*.tw.                                  | 8662    |
| 20 | Weight loss*.tw.                                    | 65165   |
| 21 | Anthropomet*.tw.                                    | 38627   |
| 22 | obesity/                                            | 160493  |
| 23 | or/13-22                                            | 546798  |
| 24 | Primary prevention/                                 | 16754   |
| 25 | (prevent* adj4 (weight or obes* or overweight)).tw. | 12500   |
| 26 | or/24-25                                            | 29042   |
| 27 | health education/                                   | 57680   |
| 28 | health promotion/                                   | 66492   |
| 29 | Healthy People Programs/                            | 1088    |
| 30 | life style/                                         | 51773   |
| 31 | healthy lifestyle/                                  | 664     |
| 32 | sedentary lifestyle/                                | 6804    |
| 33 | Diet/                                               | 143191  |
| 34 | Healthy Diet/                                       | 1444    |
| 35 | Diet, western/                                      | 491     |
| 36 | diet therapy/                                       | 10053   |
| 37 | nutrition therapy/                                  | 1817    |
| 38 | health promotion/                                   | 66492   |
| 39 | sedentary lifestyle/                                | 6804    |
| 40 | exp SPORTS/                                         | 162783  |
| 41 | exercise/                                           | 91854   |
| 42 | swimming/                                           | 16320   |
| 43 | exp RUNNING/                                        | 17879   |
| 44 | exp WALKING/                                        | 46682   |
| 45 | intervention*.tw.                                   | 695916  |

---

|    |                                                                                             |         |
|----|---------------------------------------------------------------------------------------------|---------|
| 46 | (Education adj4 (health or diet* or nutrition*)).tw.                                        | 46707   |
| 47 | (Lifestyle adj4 (intervention* or change* or modif* or education or sedentary)).tw.         | 20423   |
| 48 | (Life style adj4 (intervention* or change* or modif* or education or sedentary)).tw.        | 2049    |
| 49 | (Diet* adj4 (intervention* or change* or modify* or educat* or therap* or program)).tw.     | 34935   |
| 50 | (Nutrition adj4 (intervention* or change* or modify* or educat* or therap* or program)).tw. | 12676   |
| 51 | healthy eating*.tw.                                                                         | 4953    |
| 52 | (weight adj3 (program* or management)).tw.                                                  | 8054    |
| 53 | Physical Activit*.tw.                                                                       | 76845   |
| 54 | sport*.tw.                                                                                  | 50590   |
| 55 | exercise*.tw.                                                                               | 224388  |
| 56 | or/27-55                                                                                    | 1383450 |
| 57 | 12 and 23 and 26 and 56                                                                     | 3577    |
| 58 | randomized controlled trial.pt.                                                             | 461720  |
| 59 | controlled clinical trial.pt.                                                               | 92411   |
| 60 | randomized.ab.                                                                              | 361455  |
| 61 | placebo.ab.                                                                                 | 173029  |
| 62 | randomly.ab.                                                                                | 250125  |
| 63 | trial.ab.                                                                                   | 375176  |
| 64 | groups.ab.                                                                                  | 1562752 |
| 65 | 58 or 59 or 60 or 61 or 62 or 63 or 64                                                      | 2284246 |
| 66 | exp animals/ not humans.sh.                                                                 | 4462009 |
| 67 | 65 not 66                                                                                   | 1881199 |
| 68 | 57 and 67                                                                                   | 1352    |
| 69 | limit 68 to (english language and yr="2005 -Current")                                       | 1172    |

---
