# Supplementary material for: Effectiveness of Lifestyle Interventions for Prevention of Harmful Weight Gain among Adolescents from Ethnic Minorities: A Systematic Review
Source: MDPI journal article supplement (doi:10.3390/ijerph17176059), 2020-08-20
Supplement: s1 [file s1]

**Table S3** Risk of bias as assessed by the Cochrane Collaboration Tool<sup>32</sup> for the randomized controlled trials included in the systematic review of effectiveness of preventions interventions for adolescents from ethnic/racial minorities (n=7).

| First author,<br>year,<br>country,<br>citation          | Selection bias             |                                  |                        |                                                  |                   |                                                                                         |                   |                                                                                   |                   |                                               |
|---------------------------------------------------------|----------------------------|----------------------------------|------------------------|--------------------------------------------------|-------------------|-----------------------------------------------------------------------------------------|-------------------|-----------------------------------------------------------------------------------|-------------------|-----------------------------------------------|
|                                                         | Random sequence generation |                                  | Allocation concealment |                                                  | Attrition bias    |                                                                                         | Detection bias    |                                                                                   | Reporting bias    |                                               |
|                                                         | Cochrane Judgment          | Supporting evidence              | Cochrane judgment      | Supporting evidence                              | Cochrane judgment | Supporting evidence                                                                     | Cochrane judgment | Supporting evidence                                                               | Cochrane judgment | Supporting evidence                           |
| Black <i>et al.</i> 2010 <sup>33</sup><br>USA           | Unclear risk               | Method not stated                | Unclear risk           | Method not stated                                | Low risk          | ITT analysis performed                                                                  | Low risk          | Research assistants blinded to group allocation and baseline findings.            | Unclear risk      | Insufficient information                      |
| Chen <i>et al.</i> 2011 <sup>36</sup><br>USA            | Low risk                   | Computer random number generator | Unclear risk           | Method not stated                                | Low risk          | Dropouts balanced across groups (I: 1/27, C: 3/27), reasons for dropping out not stated | Unclear risk      | Not reported                                                                      | Unclear risk      | Insufficient information                      |
| Ebbeling <i>et al.</i> 2006 <sup>29</sup><br>USA        | Unclear risk               | Method not stated                | Low risk               | Study statistician randomized group assignments  | Low risk          | No dropouts                                                                             | Unclear risk      | Not reported                                                                      | Unclear risk      | Insufficient information                      |
| Ezendam <i>et al.</i> 2012 <sup>28</sup><br>Netherlands | Low risk                   | Random number generator          | Low risk               | Randomization was done by independent researcher | Low risk          | ITT analysis performed using baseline observation carried forward (BOCF) and            | High risk         | The researcher and research assistants were not blinded to allocation during data | Low risk          | Pre-specified outcomes from protocol reported |

| First author,<br>year,<br>country,<br>citation                          | Selection bias             |                           |                        |                     |                   |                                                    |                   |                                                     |                   |                                               |
|-------------------------------------------------------------------------|----------------------------|---------------------------|------------------------|---------------------|-------------------|----------------------------------------------------|-------------------|-----------------------------------------------------|-------------------|-----------------------------------------------|
|                                                                         | Random sequence generation |                           | Allocation concealment |                     | Attrition bias    |                                                    | Detection bias    |                                                     | Reporting bias    |                                               |
|                                                                         | Cochrane Judgment          | Supporting evidence       | Cochrane judgment      | Supporting evidence | Cochrane judgment | Supporting evidence                                | Cochrane judgment | Supporting evidence                                 | Cochrane judgment | Supporting evidence                           |
|                                                                         |                            |                           |                        |                     |                   | last observation carried forward (LOCF) procedures |                   | collection and data analyses                        |                   |                                               |
| Nollen <i>et al.</i> 2012 <sup>50</sup> , 2014 <sup>53</sup> , USA      | Unclear risk               | Method not stated         | Unclear risk           | Method not stated   | Low risk          | Nil ITT analysis                                   | Unclear risk      | Not reported                                        | Unclear risk      | Insufficient information                      |
| Singh <i>et al.</i> 2007 <sup>60</sup> , 2009 <sup>61</sup> Netherlands | Low risk                   | SPSS statistical software | Unclear risk           | Method not stated   | Low risk          | ITT analysis performed                             | High risk         | Research assistants not blinded to group allocation | Low risk          | Pre-specified outcomes from protocol reported |
| Whittemore <i>et al.</i> 2013 <sup>68</sup> USA                         | Unclear risk               | Method not stated         | Unclear risk           | Method not stated   | Low risk          | ITT analysis performed                             | Unclear risk      | Not reported                                        | Low risk          | Pre-specified outcomes from protocol reported |

ITT, Intention to Treat;

**Table S4** Risk of bias as assessed by the Cochrane Collaboration Tool<sup>32</sup> for the randomized controlled trials included in the systematic review of effectiveness of preventions interventions for adolescents from ethnic/racial minorities (n=23).

| First author,<br>year,<br>country,<br>citation                                                             | Selection bias             |                                 |                        |                                           |                   |                                                                                         |                   |                                                                                                                         |                   |                                             |
|------------------------------------------------------------------------------------------------------------|----------------------------|---------------------------------|------------------------|-------------------------------------------|-------------------|-----------------------------------------------------------------------------------------|-------------------|-------------------------------------------------------------------------------------------------------------------------|-------------------|---------------------------------------------|
|                                                                                                            | Random sequence generation |                                 | Allocation concealment |                                           | Attrition bias    |                                                                                         | Detection bias    |                                                                                                                         | Reporting bias    |                                             |
|                                                                                                            | Cochrane Judgment          | Supporting evidence             | Cochrane judgment      | Supporting evidence                       | Cochrane judgment | Supporting evidence                                                                     | Cochrane judgment | Supporting evidence                                                                                                     | Cochrane judgment | Supporting evidence                         |
| Amaro <i>et al.</i> 2006 <sup>32</sup> , Italy                                                             | Unclear risk               | Method not stated               | Unclear risk           | Method not stated                         | High risk         | Nil ITT analysis                                                                        | Unclear risk      | Not reported                                                                                                            | Unclear risk      | Insufficient information                    |
| Briancon <i>et al.</i> 2010 <sup>35</sup> , France<br>Bonsergent <i>et al.</i> 2013 <sup>34</sup> , France | Unclear risk               | Method not stated               | Unclear risk           | Method not stated                         | Low risk          | ITT analysis performed                                                                  | Unclear risk      | Not reported                                                                                                            | Low risk          | All pre-specified primary outcomes reported |
| Dunker <i>et al.</i> 2017 <sup>38</sup> , Brazil                                                           | Low risk                   | Random selection of paper slips | Low risk               | Paper slips selected by school principals | Low risk          | ITT analysis performed                                                                  | Low risk          | Blinding present during data analysis, (no blinding during assignment and assessment unlikely to have affected outcome) | Low risk          | All pre-specified primary outcomes reported |
| French <i>et al.</i> 2011 <sup>27</sup> , USA                                                              | Unclear risk               | Method not stated               | Unclear risk           | Method not stated                         | Low risk          | Dropouts balanced across groups (I: 2/45, C: 1/44), reasons for dropping out not stated | High risk         | Assessors and subjects not blinded to group allocation                                                                  | Unclear risk      | Insufficient information                    |

| First author,<br>year,<br>country,<br>citation                                                                                      | Selection bias             |                                                  |                        |                                                            |                   |                                                                                                          |                   |                                                                                                         |                   |                                                        |
|-------------------------------------------------------------------------------------------------------------------------------------|----------------------------|--------------------------------------------------|------------------------|------------------------------------------------------------|-------------------|----------------------------------------------------------------------------------------------------------|-------------------|---------------------------------------------------------------------------------------------------------|-------------------|--------------------------------------------------------|
|                                                                                                                                     | Random sequence generation |                                                  | Allocation concealment |                                                            | Attrition bias    |                                                                                                          | Detection bias    |                                                                                                         | Reporting bias    |                                                        |
|                                                                                                                                     | Cochrane Judgment          | Supporting evidence                              | Cochrane judgment      | Supporting evidence                                        | Cochrane judgment | Supporting evidence                                                                                      | Cochrane judgment | Supporting evidence                                                                                     | Cochrane judgment | Supporting evidence                                    |
| Haerens <i>et al.</i> 2006 <sup>40</sup> , Belgium                                                                                  | Unclear risk               | Method not stated                                | Unclear risk           | Method not stated                                          | High risk         | Nil ITT analysis                                                                                         | Unclear risk      | Not reported                                                                                            | Unclear risk      | Insufficient information                               |
| Hollis <i>et al.</i> 2016 <sup>41</sup> , Australia<br>Sutherland <i>et al.</i> 2013 <sup>65</sup> , 2016 <sup>66</sup> , Australia | Low risk                   | Computer generated block randomization procedure | Low risk               | Allocated by an independent statistician                   | Low risk          | ITT analysis performed                                                                                   | Unclear risk      | Study did not address whether blinding occurred                                                         | Low risk          | Pre-specified outcomes from protocol reported          |
| Leme <i>et al.</i> 2015 <sup>43</sup> , 2016 <sup>26</sup> , 2018 <sup>42</sup> Brazil                                              | Low risk                   | Paper slips chosen out of a bag                  | Low risk               | Allocated by individual not involved with research project | Low risk          | ITT analysis performed                                                                                   | Low risk          | Baseline and post-test assessments conducted by trained research assistants blinded to group allocation | Low risk          | Pre-specified primary outcomes from protocol reported. |
| Lindgren <i>et al.</i> 2011 <sup>44</sup> , Sweden                                                                                  | Unclear risk               | Method not stated                                | Unclear risk           | Method not stated                                          | High risk         | ITT analysis not performed, dropouts not reported (I: 27/54, 21/56) and reasons for dropout not reported | High risk         | research team delivered intervention                                                                    | Unclear risk      | Insufficient information                               |
| Lubans <i>et al.</i> 2011 <sup>45</sup> , 201,6 <sup>48</sup> Australia                                                             | Unclear risk               | Method not stated                                | Unclear risk           | Method not stated                                          | High risk         | ITT analysis not performed, dropouts not                                                                 | High risk         | Research assistants and participants not blinded to allocation                                          | Low risk          | Pre-specified outcomes from protocol reported          |

| First author,<br>year,<br>country,<br>citation                                                                                     | Selection bias             |                                                                             |                        |                                                                                          |                   |                                                                                                                                        |                   |                                                                                                                                       |                   |                                                        |
|------------------------------------------------------------------------------------------------------------------------------------|----------------------------|-----------------------------------------------------------------------------|------------------------|------------------------------------------------------------------------------------------|-------------------|----------------------------------------------------------------------------------------------------------------------------------------|-------------------|---------------------------------------------------------------------------------------------------------------------------------------|-------------------|--------------------------------------------------------|
|                                                                                                                                    | Random sequence generation |                                                                             | Allocation concealment |                                                                                          | Attrition bias    |                                                                                                                                        | Detection bias    |                                                                                                                                       | Reporting bias    |                                                        |
|                                                                                                                                    | Cochrane Judgment          | Supporting evidence                                                         | Cochrane judgment      | Supporting evidence                                                                      | Cochrane judgment | Supporting evidence                                                                                                                    | Cochrane judgment | Supporting evidence                                                                                                                   | Cochrane judgment | Supporting evidence                                    |
|                                                                                                                                    |                            |                                                                             |                        |                                                                                          |                   | balanced between groups (I: 13/50, C: 5/50) and reasons for dropout not reported                                                       |                   |                                                                                                                                       |                   |                                                        |
| Lubans <i>et al.</i> 2010 <sup>46</sup> , 2012 <sup>47</sup><br>Australia<br>Dewar <i>et al.</i> 2013 <sup>37</sup> ,<br>Australia | Unclear risk               | Method not stated                                                           | Low risk               | Allocated by an independent researcher                                                   | Low risk          | ITT analysis performed                                                                                                                 | High risk         | Research team blinded to group allocation only at baseline                                                                            | Low risk          | Pre-specified outcomes from protocol reported          |
| Melnyk <i>et al.</i> 2013 <sup>25</sup> , USA                                                                                      | Low risk                   | Placing all of the school names in a hat and then randomly drawing them out | Low risk               | Names drawn were assigned either to COPE or control based on being drawn out of the hat. | Unclear risk      | Intention to treat? Does not say how. Dropouts not balanced between groups (I: 88/374, C: 93/433) and reasons for dropout not reported | Low risk          | Teachers and participants were blinded to study arm. Research assistants collecting measures/outcomes were blinded to study grouping. | Low risk          | Pre-specified primary outcomes from protocol reported. |
| Mihas <i>et al.</i> 2009 <sup>49</sup> ,<br>Greece                                                                                 | Low risk                   | Computer random                                                             | Unclear risk           | Method not stated                                                                        | Low risk          | Nil ITT analysis                                                                                                                       | High risk         | Research assistants and participants                                                                                                  | Unclear risk      | Insufficient information                               |

| First author,<br>year,<br>country,<br>citation     | Selection bias             |                                  |                        |                     |                   |                                                                                                                        |                   |                                                                                   |                   |                          |
|----------------------------------------------------|----------------------------|----------------------------------|------------------------|---------------------|-------------------|------------------------------------------------------------------------------------------------------------------------|-------------------|-----------------------------------------------------------------------------------|-------------------|--------------------------|
|                                                    | Random sequence generation |                                  | Allocation concealment |                     | Attrition bias    |                                                                                                                        | Detection bias    |                                                                                   | Reporting bias    |                          |
|                                                    | Cochrane Judgment          | Supporting evidence              | Cochrane judgment      | Supporting evidence | Cochrane judgment | Supporting evidence                                                                                                    | Cochrane judgment | Supporting evidence                                                               | Cochrane judgment | Supporting evidence      |
|                                                    |                            | number generator                 |                        |                     |                   |                                                                                                                        |                   | not blinded to allocation                                                         |                   |                          |
| Neumark <i>et al.</i> 2010 <sup>24</sup> USA       | Unclear risk               | Method not stated                | Unclear risk           | Method not stated   | High risk         | Nil ITT analysis                                                                                                       | High risk         | Research staff not blinded                                                        | Unclear risk      | Insufficient information |
| Patrick <i>et al.</i> 2006 <sup>52</sup>           | Unclear risk               | Method not stated                | Unclear risk           | Method not stated   | Low risk          | ITT performed using baseline observation carried forward (BOCF) and last observation carried forward (LOCF) procedures | Unclear risk      | Not reported                                                                      | Unclear risk      | Insufficient information |
| Peralta <i>et al.</i> 2009 <sup>53</sup> Australia | Low risk                   | Computer random number generator | Unclear risk           | Method not stated   | Low risk          | ITT analysis performed                                                                                                 | Low risk          | Measurements conducted by trained independent assessors blind to group allocation | Unclear risk      | Insufficient information |
| Rabiei <i>et al.</i> 2017 <sup>54</sup> , Iran     | Unclear risk               | Method not stated                | Unclear risk           | Method not stated   | Unclear risk      | Dropouts not reported                                                                                                  | Unclear risk      | Not reported                                                                      | Unclear risk      | Insufficient information |
| Rodearmel <i>et al.</i> 2007 <sup>55</sup> USA     | Unclear risk               | Method not stated                | Unclear risk           | Method not stated   | High risk         | Nil ITT analysis                                                                                                       | Unclear risk      | Not reported                                                                      | Unclear risk      | Insufficient information |

| First author,<br>year,<br>country,<br>citation                              | Selection bias             |                                                  |                        |                                     |                   |                                                                                                                              |                   |                                                                                                            |                   |                                               |
|-----------------------------------------------------------------------------|----------------------------|--------------------------------------------------|------------------------|-------------------------------------|-------------------|------------------------------------------------------------------------------------------------------------------------------|-------------------|------------------------------------------------------------------------------------------------------------|-------------------|-----------------------------------------------|
|                                                                             | Random sequence generation |                                                  | Allocation concealment |                                     | Attrition bias    |                                                                                                                              | Detection bias    |                                                                                                            | Reporting bias    |                                               |
|                                                                             | Cochrane Judgment          | Supporting evidence                              | Cochrane judgment      | Supporting evidence                 | Cochrane judgment | Supporting evidence                                                                                                          | Cochrane judgment | Supporting evidence                                                                                        | Cochrane judgment | Supporting evidence                           |
| Simons <i>et al.</i> 2014 <sup>58</sup> , 2015 <sup>57</sup><br>Netherlands | Low risk                   | Computer generated block randomization procedure | Unclear risk           | Method not stated                   | Low risk          | ITT analysis performed                                                                                                       | High Risk         | Participants and research assistants blinded at baseline, but not at T4 and T10. Data analyses not blinded | Low risk          | Pre-specified outcomes from protocol reported |
| Singhal <i>et al.</i> 2010 <sup>62</sup><br>India                           | Unclear risk               | Method not stated                                | Unclear risk           | Method not stated                   | Low risk          | ITT analysis performed                                                                                                       | Unclear risk      | Not reported                                                                                               | Unclear risk      | Insufficient information                      |
| Smith <i>et al.</i> 2014 <sup>63,64</sup><br>Australia                      | Low risk                   | Computer random number generator                 | Low risk               | Performed by independent researcher | Low risk          | ITT analysis performed                                                                                                       | Unclear risk      | Not reported                                                                                               | Low risk          | Pre-specified outcomes from protocol reported |
| Thakur <i>et al.</i> 2016 <sup>23</sup> , India                             | Unclear risk               | Method not stated                                | Unclear risk           | Method not stated                   | Low risk          | ITT analysis performed                                                                                                       | Unclear risk      | Not reported                                                                                               | Unclear risk      | Insufficient information                      |
| Viggiano <i>et al.</i> 2015 <sup>67</sup> , Italy                           | Low risk                   | Computer random number generator                 | Unclear risk           | Method not stated                   | Low risk          | ITT analysis not performed but reasons for attrition unlikely to have influenced outcomes, attrition bias analyses performed | Unclear risk      | Not reported                                                                                               | Unclear risk      | Insufficient information                      |
| Weeks <i>et al.</i> <sup>22</sup>                                           | low risk                   | Random number generator                          | Low risk               | Blind allocation at baseline        | Low risk          | ITT analysis performed                                                                                                       | High risk         | Researcher delivered program to intervention                                                               | Unclear risk      | Insufficient information                      |

| First author,<br>year,<br>country,<br>citation | Selection bias             |                     |                        |                     |                   |                     |                   |                                                        |                   |                     |
|------------------------------------------------|----------------------------|---------------------|------------------------|---------------------|-------------------|---------------------|-------------------|--------------------------------------------------------|-------------------|---------------------|
|                                                | Random sequence generation |                     | Allocation concealment |                     | Attrition bias    |                     | Detection bias    |                                                        | Reporting bias    |                     |
|                                                | Cochrane Judgment          | Supporting evidence | Cochrane judgment      | Supporting evidence | Cochrane judgment | Supporting evidence | Cochrane judgment | Supporting evidence                                    | Cochrane judgment | Supporting evidence |
| 2012<br>Australia                              |                            |                     |                        |                     |                   |                     |                   | group and<br>conducted<br>measurements and<br>analyses |                   |                     |

ITT, Intention to Treat;
